# Supplementary material for: Tumor necrosis factor (TNF)-receptor 1 and 2 mediate homeostatic synaptic plasticity of denervated mouse dentate granule cells
Source: PubMed Central journal article supplement (PMC4526848; doi:10.1038/srep12726), 2015-08-06
Supplement: srep12726-s1.pdf [file srep12726-s1.pdf]

## SUPPLEMENTARY INFORMATION:

### Tumor necrosis factor (TNF)-receptor 1 and 2 mediate homeostatic synaptic plasticity of denervated mouse dentate granule cells by Denise Becker, Thomas Deller, Andreas Vlachos

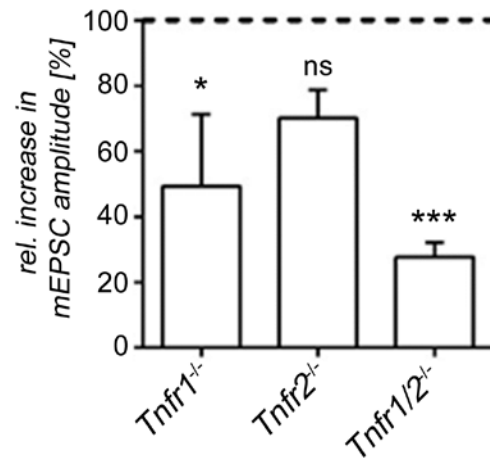

**Figure S1:** Relative increase in mEPSC amplitudes of denervated dentate granule cells from TNFR deficient preparations (3 - 4 days post lesion; dpl) compared/normalized to the denervation-induced homeostatic synaptic strengthening seen in wild type preparations at 3 - 4 dpl (wild type data taken from Becker et al., 2013; wildtype: 100 ± 15 %; *Tnfr1<sup>-/-</sup>*: 49 ± 21 %; *Tnfr2<sup>-/-</sup>*: 70 ± 8 %; *Tnfr1/2<sup>-/-</sup>*: 27 ± 4 %, n = 10-41 cells; at least 4 cultures per group; Kruskal-Wallis-test followed by Dunn's post-hoc-test; \* p < 0.05; \*\*\* p < 0.001; ns, not significant).

#### Reference:

Becker, D., Zahn, N., Deller, T. & Vlachos, A. Tumor necrosis factor alpha maintains denervation-induced homeostatic synaptic plasticity of mouse dentate granule cells. *Front Cell Neurosci* 7, 257, doi:10.3389/fncel.2013.00257 (2013).

**Figure S2: Wildtype slice cultures treated with TNFR-activating antibodies for 3 days**

| GROUP            | mEPSC amplitude [pA] |                        |                        | mEPSC frequency [Hz] |                       |                                  |
|------------------|----------------------|------------------------|------------------------|----------------------|-----------------------|----------------------------------|
|                  | control              | TNFR1-AB treated       | TNFR2-AB treated       | control              | TNFR1-AB treated      | TNFR2-AB treated                 |
| <b>wild type</b> | 11.6 ± 0.5<br>(10)   | 15.6 ± 1.0<br>(12); ** | 15.2 ± 0.6<br>(15); ** | 1.9 ± 0.3<br>(10)    | 4.7 ± 0.4<br>(12); ** | 1.2 ± 0.2<br>(15); <sup>ns</sup> |

All values expressed as mean ± standard error of the mean; number of neurons recorded per group indicated in brackets: Kruskal-Wallis-test followed by Dunn's post-hoc correction; \*\* p < 0.01. ns, not significant

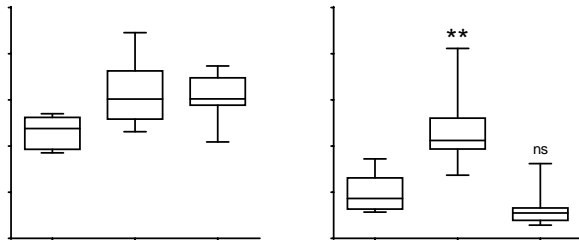

Box-Whisker-Plot of data from Table S1. \*\* p < 0.01; ns, not significant.

**Figure S3: Slice cultures prepared from TNFR-deficient mice**

| GROUP                         | mEPSC amplitude [pA] |                         |                                   | mEPSC frequency [Hz] |                                  |                                  |
|-------------------------------|----------------------|-------------------------|-----------------------------------|----------------------|----------------------------------|----------------------------------|
|                               | control              | 3 - 4 days post lesion  | TNFR-AB treated                   | control              | 3 - 4 days post lesion           | TNFR-AB treated                  |
| <i>Tnfr1</i> <sup>-/-</sup>   | 13.6 ± 0.7<br>(16)   | 17.3 ± 1.6<br>(10); *   | 12.9 ± 0.5<br>(15); <sup>ns</sup> | 1.7 ± 0.2<br>(16)    | 2.8 ± 0.3<br>(10); *             | 1.4 ± 0.1<br>(15); <sup>ns</sup> |
| <i>Tnfr2</i> <sup>-/-</sup>   | 9.9 ± 0.5<br>(12)    | 13.8 ± 0.5<br>(13); *** | 12.3 ± 0.6<br>(15); <sup>ns</sup> | 2.0 ± 0.3<br>(12)    | 4.0 ± 0.3<br>(13); ***           | 2.9 ± 0.2<br>(15); <sup>ns</sup> |
| <i>Tnfr1/2</i> <sup>-/-</sup> | 13.0 ± 0.5<br>(36)   | 15.0 ± 0.3<br>(41); *** | -----                             | 1.6 ± 0.1<br>(36)    | 2.2 ± 0.2<br>(41); <sup>ns</sup> | -----                            |

*Tnfr1*<sup>-/-</sup> treated with TNFR1-AB for 3d; *Tnfr2*<sup>-/-</sup> treated with TNFR2-AB for 3d; all values expressed as mean ± standard error of the mean; number of neurons recorded per group indicated in brackets: Kruskal-Wallis-test followed by Dunn's post-hoc correction for *Tnfr1*<sup>-/-</sup> and *Tnfr2*<sup>-/-</sup>; Mann-Whitney-test for *Tnfr1/2*<sup>-/-</sup>; \* p < 0.05; \*\*\* p < 0.001. ns, not significant

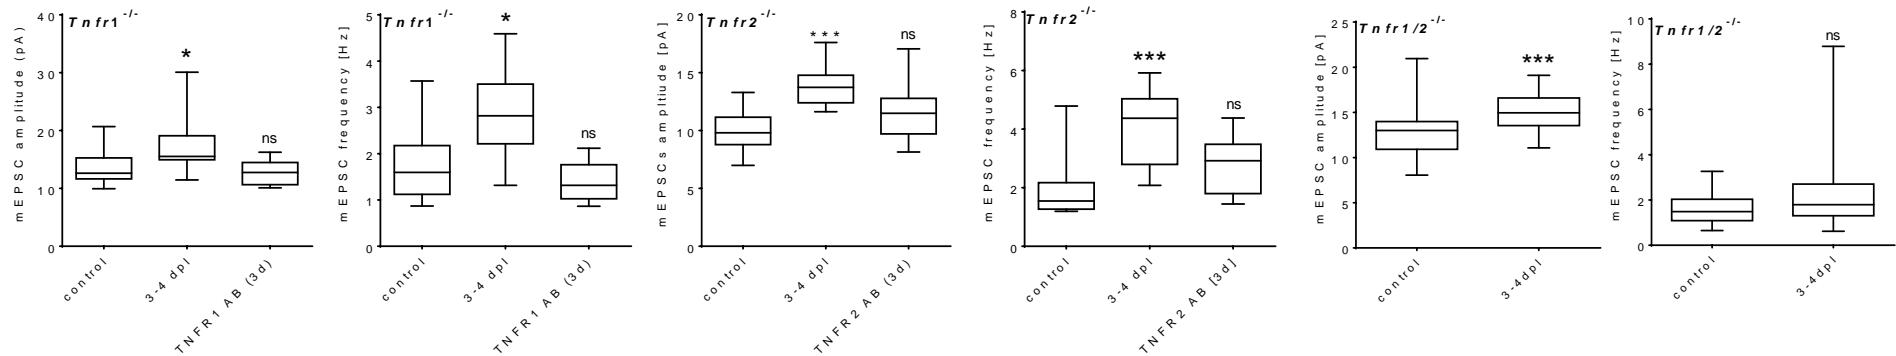

Box-Whisker-Plot of data from Table S2. days post lesion (dpi). \* p < 0.05; \*\*\* p < 0.001; ns, not significant.

**Figure S4: qPCR analysis of TNFR-mRNA levels**

| GROUP      | TNFR1-mRNA (x fold change) |                                 |                                 |                                  | TNFR2-mRNA (x fold change) |                                 |                                 |                                 |
|------------|----------------------------|---------------------------------|---------------------------------|----------------------------------|----------------------------|---------------------------------|---------------------------------|---------------------------------|
|            | control                    | 1 dpl                           | 2 dpl                           | 4 dpl                            | control                    | 1 dpl                           | 2 dpl                           | 4 dpl                           |
| <b>GCL</b> | 1.0 ± 0.1<br>(4)           | 2.5 ± 0.7<br>(4); *             | 1.5 ± 0.4<br>(4); <sup>ns</sup> | 1.2 ± 0.02<br>(4); <sup>ns</sup> | 1.0 ± 0.3<br>(4)           | 3.0 ± 0.8<br>(4); *             | 2.0 ± 0.4<br>(4); <sup>ns</sup> | 1.7 ± 0.5<br>(4); <sup>ns</sup> |
| <b>IML</b> | 1.0 ± 0.3<br>(4)           | 1.2 ± 0.3<br>(4); <sup>ns</sup> | 1.0 ± 0.1<br>(5); <sup>ns</sup> | 0.7 ± 0.1<br>(6); <sup>ns</sup>  | 1.0 ± 0.2<br>(4)           | 1.1 ± 0.2<br>(5); <sup>ns</sup> | 2.0 ± 0.4<br>(4); <sup>ns</sup> | 0.8 ± 0.2<br>(6); <sup>ns</sup> |
| <b>OML</b> | 1.0 ± 0.2<br>(6)           | 1.7 ± 0.3<br>(5); <sup>ns</sup> | 1.3 ± 0.2<br>(7); <sup>ns</sup> | 1.1 ± 0.2<br>(8); <sup>ns</sup>  | 1.0 ± 0.2<br>(6)           | 0.9 ± 0.1<br>(5); <sup>ns</sup> | 1.5 ± 0.2<br>(7); <sup>ns</sup> | 2.1 ± 0.3<br>(6); *             |

All values expressed as mean ± standard error of the mean; number of probes per group indicated in brackets: Kruskal-Wallis-test followed by Dunn's post-hoc correction; \* p < 0.05; \*\*\* p < 0.001. ns, not significant

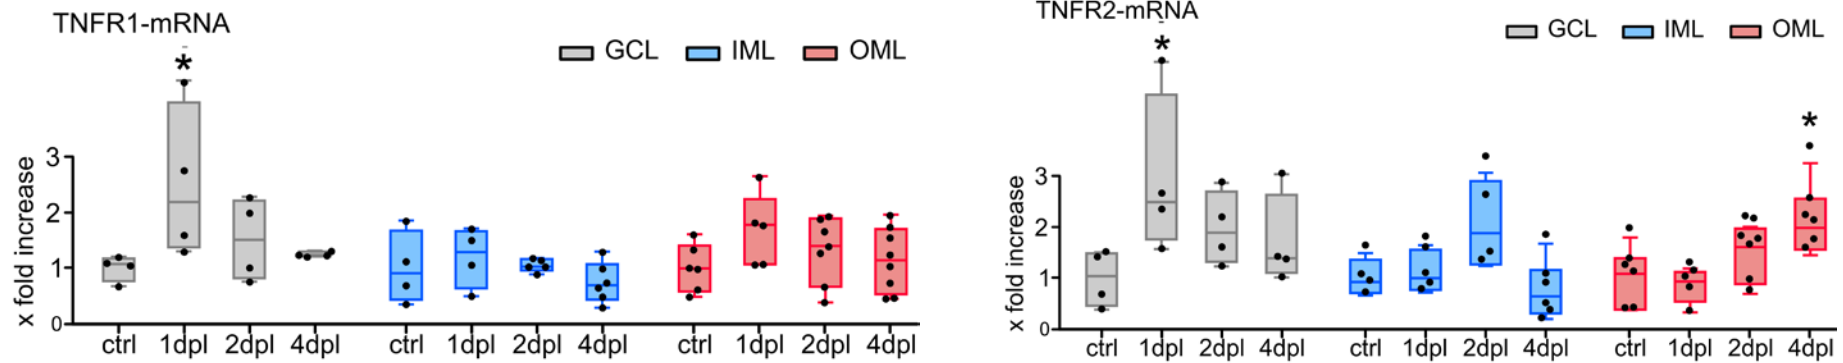

Box-Whisker-Plot of data shown in Table S3. Days post lesion (dpl). \* p < 0.05.
